# Supplementary material for: The oncolytic virus dl922-947 reduces IL-8/CXCL8 and MCP-1/CCL2 expression and impairs angiogenesis and macrophage infiltration in anaplastic thyroid carcinoma
Source: PubMed Central journal article supplement (PMC4811476; doi:10.18632/oncotarget.6430), 2015-11-29
Supplement: oncotarget-07-1500-s001.pdf [file oncotarget-07-1500-s001.pdf]

# **The oncolytic virus dl922-947 reduces IL-8/CXCL8 and MCP-1/CCL2 expression and impairs angiogenesis and macrophage infiltration in anaplastic thyroid carcinoma**

## **Supplementary Materials and Methods**

### **FACS analysis**

Cells were seeded in 100 mm cell culture dish at density of  $3 \times 10^5$  cells/dish and treated as indicated. Annexin V/PI staining and cell cycle profile were analyzed as previously described [1].

### **References**

1. Passaro C, Volpe M, Botta G, Scamardella E, Perruolo G, Gillespie D, Libertini S, Portella G. PARP inhibitor olaparib increases the oncolytic activity of dl922-947 in in vitro and in vivo model of anaplastic thyroid carcinoma. *Mol Oncol.* 2015; 9: 78-92.

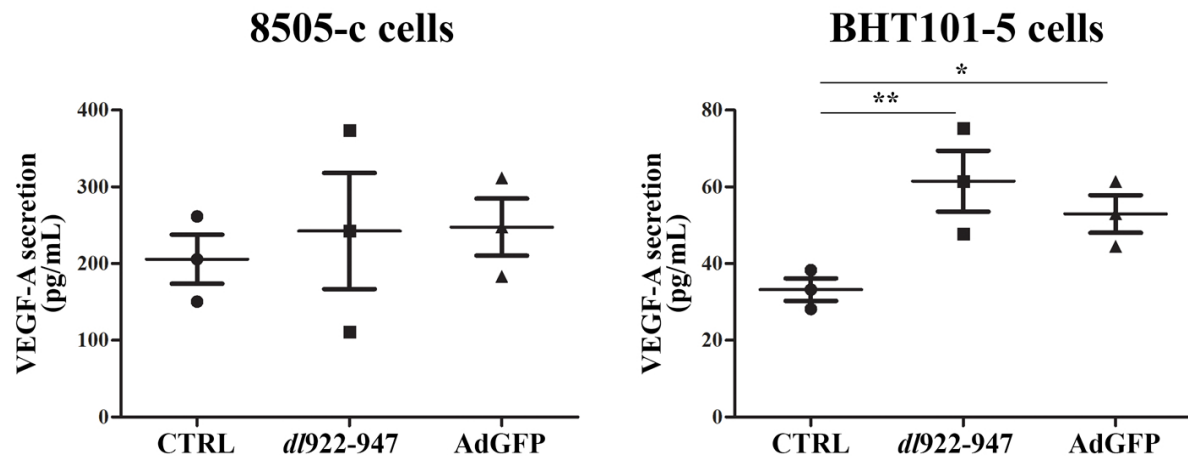

**Supplementary Figure 1**

A) 8505-c and BHT101-5 cells were treated with *dl922-947* or the non-replicating adenovirus AdGFP (5 and 1 pfu/cell, respectively). 48 hours after infection VEGF-A secretion was assessed by ELISA on cell-free supernatants. The results are the mean of three independent experiments  $\pm$ SEM. One-way ANOVA and Tuckey post-test: \* $p < 0.05$ ; \*\* $p < 0.01$ .

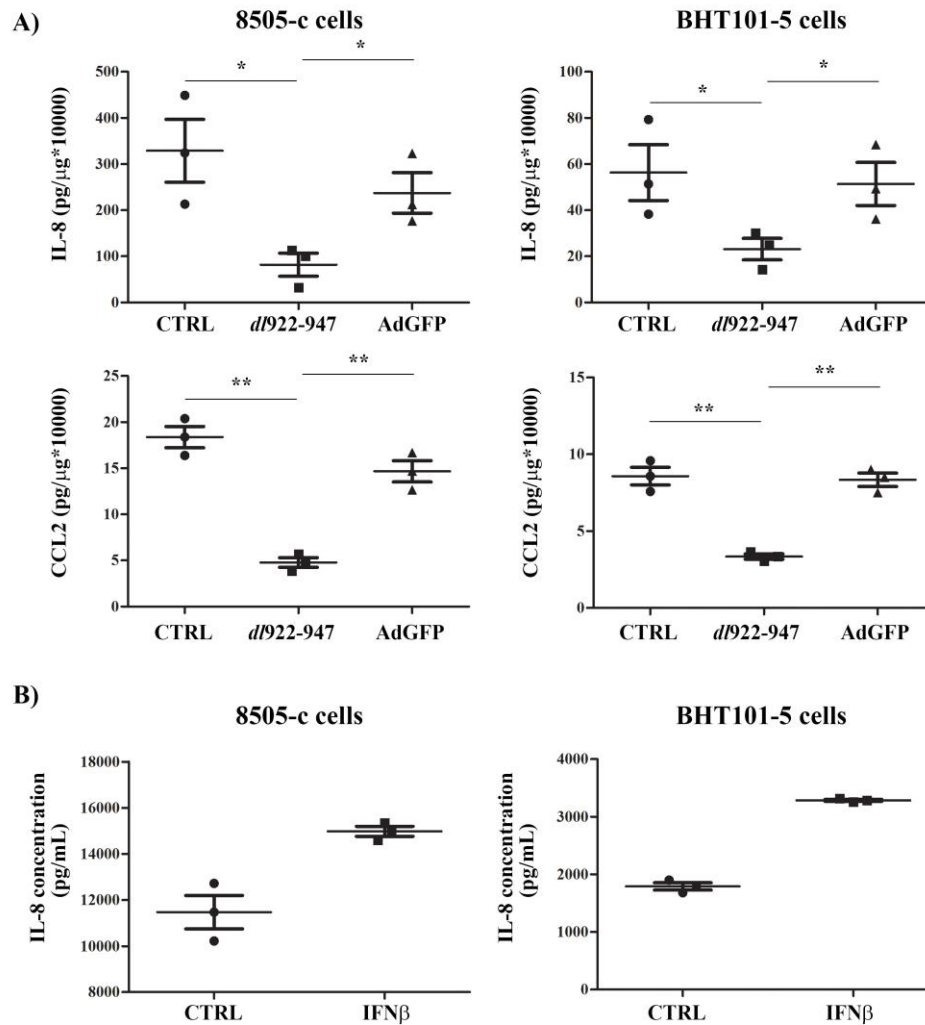

### Supplementary Figure 2

**A)** 8505-c and BHT101-5 cells were treated with *dl922-947* or the non-replicating adenovirus AdGFP (5 and 1 pfu/cell, respectively). 48 hours after infection IL-8 and CCL2 secretion was assessed by ELISA on cell-free supernatants. IL-8 and CCL2 levels were expressed as picograms per microgram of total cellular protein content. The results are the mean of three independent experiments  $\pm$ SEM. One-way ANOVA and Tukey post-test: \* $p < 0.05$ ; \*\* $p < 0.01$ .

**B)** 8505-c and BHT101-5 cells were treated with IFN $\beta$  (10 ng/mL). After 48 hours IL-8 and CCL2 secretion was assessed by ELISA on cell-free supernatants. The results are the mean of three independent experiments  $\pm$ SEM.

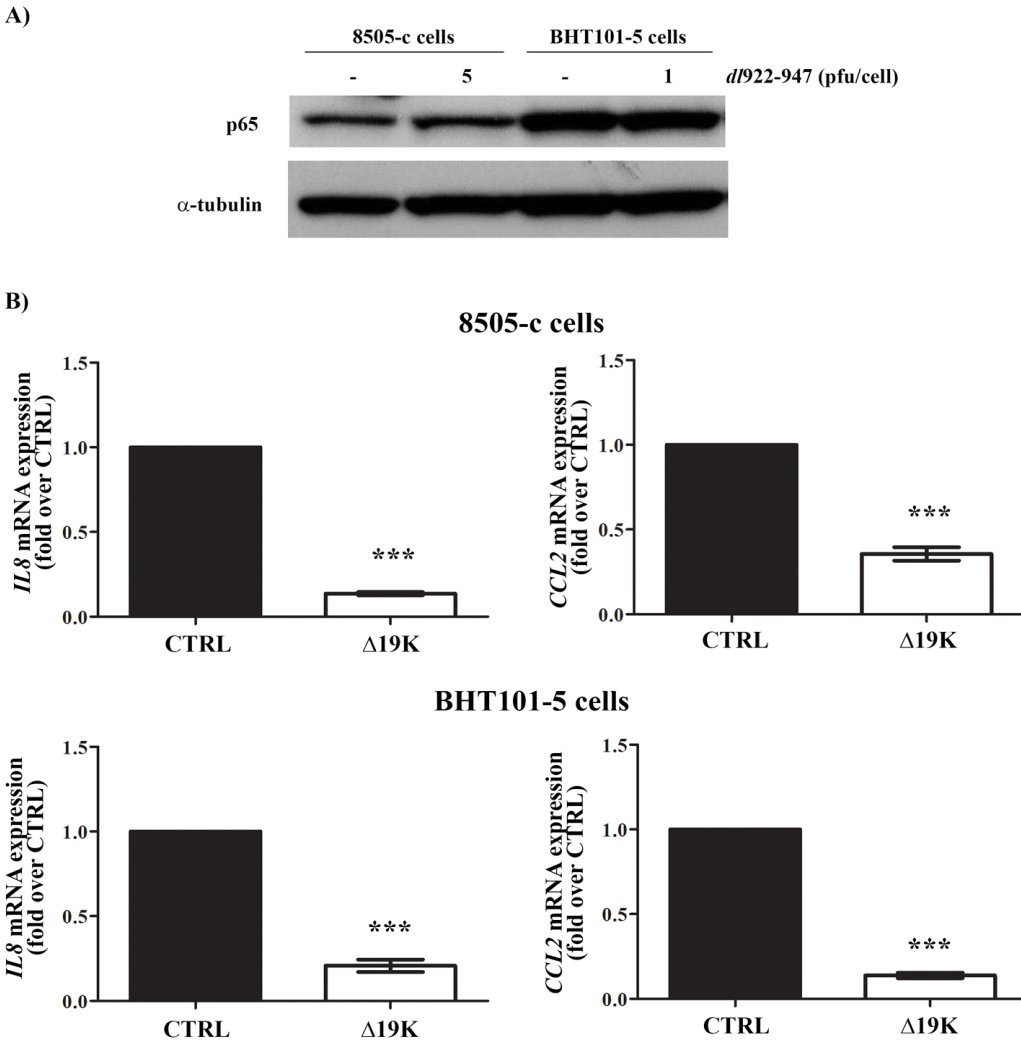

### Supplementary Figure 3

**A)** 8505-c and BHT101-5 cells were treated for 24 hours with *dl922-947* (5 and 1 pfu/cell, respectively). Total lysates were probed with p65 antibody.  $\alpha$ -tubulin has been used as loading control. The blot is representative of three independent experiments.

**B)** 8505-c and BHT101-5 cells were treated with the viral mutant  $\Delta$ 19K. After 48 hours *IL8* and *CCL2* expression was assessed by Real-Time PCR. The results are the mean of three independent experiments  $\pm$ SEM. One-way ANOVA and Tuckey post-test: \*\*\* $p < 0.001$ .

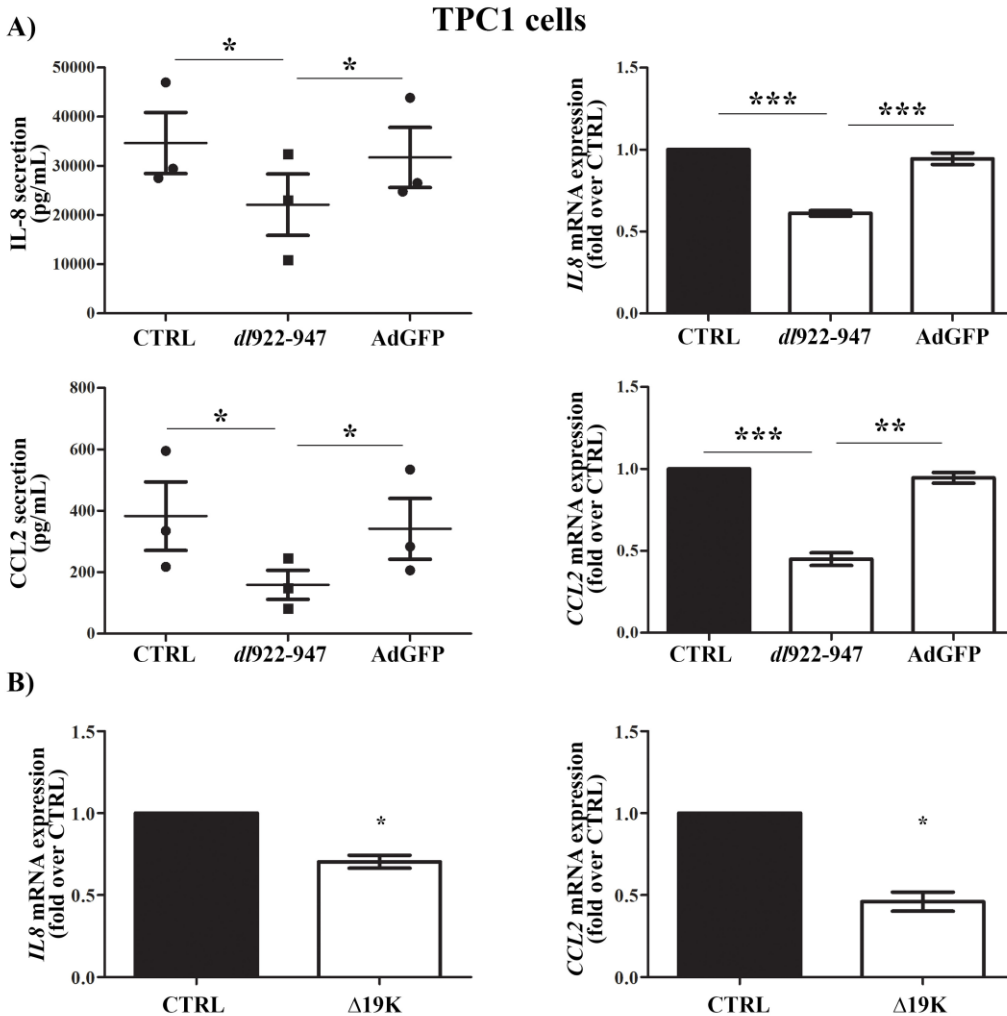

### Supplementary Figure 4

**A)** TPC1 cells were treated with *dl922-947* or the non-replicating adenovirus AdGFP (5 pfu/cell for both viruses). 48 hours after infection IL-8 and CCL2 secretion (left panels) and expression (right panels) were assessed by ELISA on cell-free supernatants and Real-Time PCR, respectively. The results are the mean of three independent experiments  $\pm$ SEM. One-way ANOVA and Tuckey post-test: \* $p < 0.05$ ; \*\* $p < 0.01$ ; \*\*\* $p < 0.001$ .

**B)** TPC1 cells were treated with the viral mutant  $\Delta 19K$ . After 48 hours *IL8* and *CCL2* expression was assessed by Real-Time PCR. The results are the mean of three independent experiments  $\pm$ SEM. One-way ANOVA and Tuckey post-test: \* $p < 0.05$ .

## TPC1 cells

A)

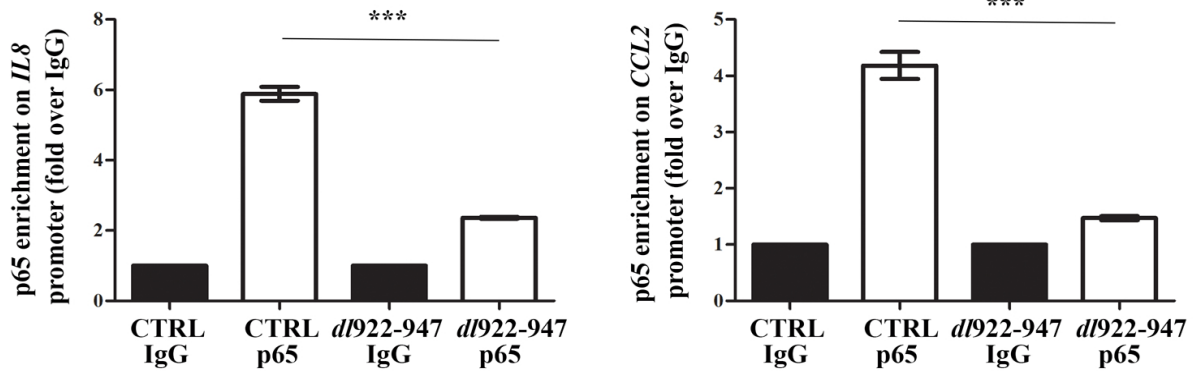

B)

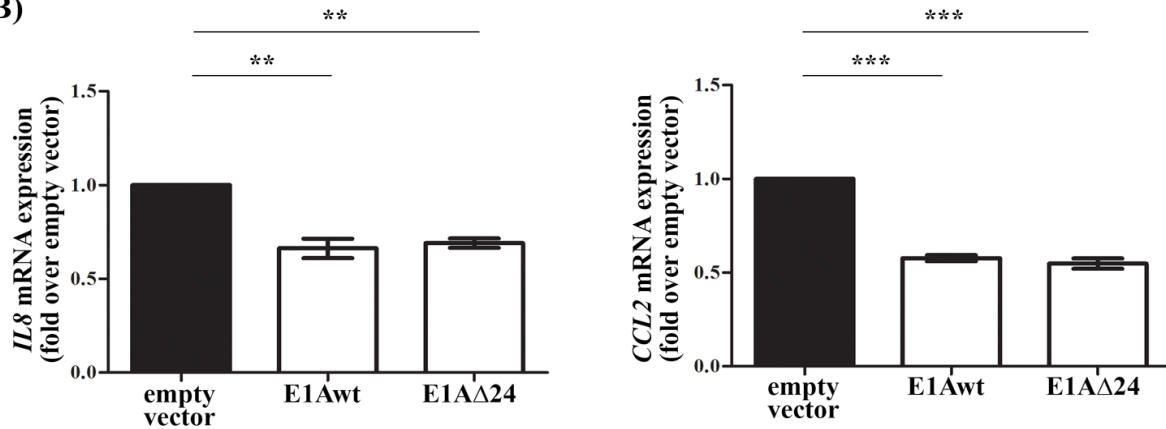

### Supplementary Figure 5

A) TPC1 cells were treated with *dl922-947* (5 pfu/mL). After 24 hours, p65 binding to *IL8* (left panel) and *CCL2* (right panel) promoters was assessed by chromatin immunoprecipitation (ChIP) assay. For each experimental condition, p65 binding is expressed as fold enrichment over the non-specific binding (IgG) control. The results are the mean of three independent experiments  $\pm$ SEM. One-way ANOVA and Tuckey post-test: \*\*\* $p < 0.001$ .

B) TPC1 cells were transfected with wild type (E1Awt) or a mutated form (E1A $\Delta$ 24) of the adenoviral protein E1A. 32 hours after transfection *IL8* and *CCL2* mRNA expression was evaluated by Real-Time PCR. The results are the mean of three independent experiments  $\pm$ SEM. One-way ANOVA and Tuckey post-test: \*\* $p < 0.01$ ; \*\*\* $p < 0.001$ .

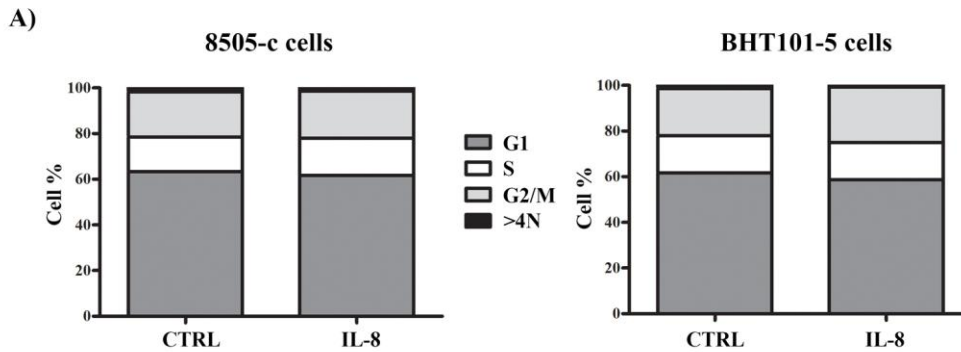

B)

8505-c cells

|                                 | Living cells | only PI +ve cells | AnnV+ve cells |
|---------------------------------|--------------|-------------------|---------------|
| CTRL                            | 94.8 ± 2.4   | 0.9 ± 0.2         | 4.3 ± 0.9     |
| <i>dl922-947</i> (5 pfu/cell)   | 53.4 ± 2.8   | 3.3 ± 0.4         | 43.3 ± 3.2    |
| IL-8 (10 ng/mL)                 | 94.6 ± 2.0   | 1.8 ± 0.4         | 3.6 ± 0.5     |
| <i>dl922-947</i> + IL-8         | 49.1 ± 3.1   | 3.4 ± 0.8         | 47.3 ± 4.0    |
| <i>dl922-947</i> + IL-8 (24hpi) | 53.5 ± 2.9   | 4.2 ± 0.5         | 42.2 ± 3.4    |

BHT101-5 cells

|                                 | Living cells | only PI +ve cells | AnnV+ve cells |
|---------------------------------|--------------|-------------------|---------------|
| CTRL                            | 93.3 ± 1.8   | 2.5 ± 0.6         | 4.2 ± 0.8     |
| <i>dl922-947</i> (1 pfu/cell)   | 77.2 ± 1.6   | 5.7 ± 1.0         | 17.2 ± 1.1    |
| IL-8 (10 ng/mL)                 | 91.2 ± 1.9   | 4.5 ± 0.8         | 4.3 ± 0.5     |
| <i>dl922-947</i> + IL-8         | 75.7 ± 1.5   | 6.5 ± 1.1         | 15.8 ± 1.4    |
| <i>dl922-947</i> + IL-8 (24hpi) | 75.2 ± 1.8   | 7.7 ± 2.3         | 17.1 ± 1.1    |

### Supplementary Figure 6

A) 8505-c and BHT101-5 cells were treated or not (CTRL) with IL-8 (10 ng/mL). After 24 hours fixed cells were stained with propidium iodide and cell cycle distribution was analyzed by FACS.

The results are the mean of three independent experiments.

B) 8505-c and BHT101-5 cells were treated with *dl922-947* (5 or 1 pfu/cell respectively) to induce cell death. Recombinant IL-8 was added at the time of infection (*dl922-947*+IL-8) or 24 hours after infection (*dl922-947*+IL-8 24 hpi). 72 hours after infection cells were collected and stained with Annexin V and propidium iodide. Annexin V positive cells (AnnV+ve) represent apoptotic cells, whereas only PI positive cells (PI+ve) are likely necrotic cell. Data in the table are the mean of three independent experiments ±SEM.

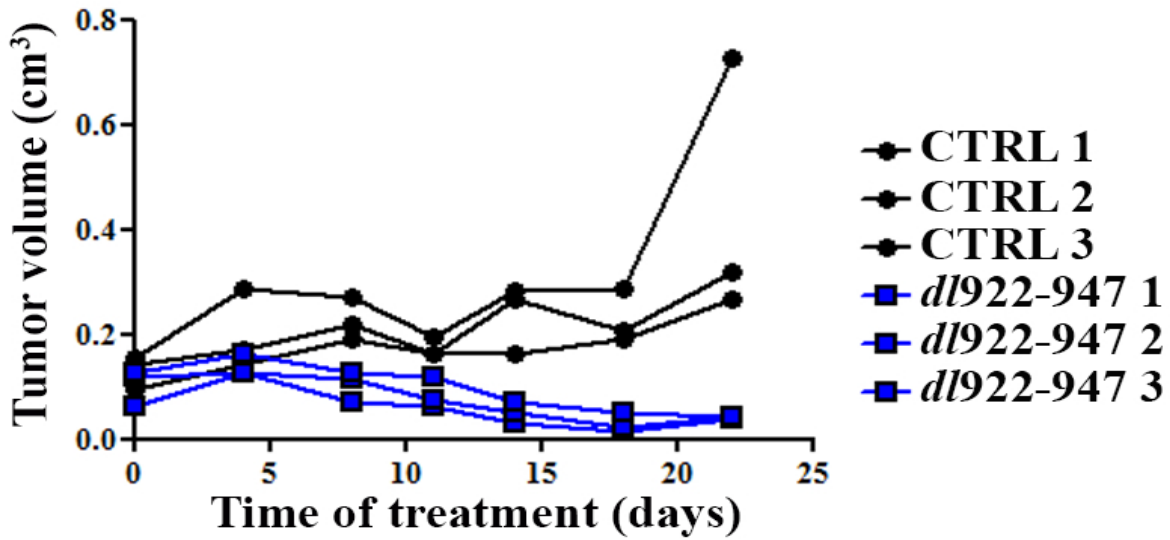

### Supplementary Figure 7

6 week-old female CD1 athymic mice (15/group) were injected into the right flank with 8505-c cells ( $1 \times 10^7$  cells/0.2 mL). Two weeks after tumor injection, mice were treated intratumorally with *dl922-947* ( $5 \times 10^7$  pfu) or its vehicle (CTRL) at day 0, 4, 8, 11 and 14 (day 0 = first injection of the virus). Tumor diameters were measured with calipers at day 0, 4, 8, 11, 14, 18 and 22 and tumor volume was calculated. The graph show the tumor growth curves for representative mice (three per group).



**Supplementary Table 1**

| <b>mRNA</b>                             | <b>5'→3'</b>                            |
|-----------------------------------------|-----------------------------------------|
| <b>human <i>IL8</i></b>                 | <b>Forward:</b> TTCCAAGCTGGCCGTGGCTC    |
|                                         | <b>Reverse:</b> TGTGTTGGCGCAGTGTGGTCC   |
| <b>human <i>CCL2</i></b>                | <b>Forward:</b> GATCTCAGTGCAGAGGCTCG    |
|                                         | <b>Reverse:</b> TTTGCTTGTCCAGGTGGTCC    |
| <b>human <i>GAPDH</i></b>               | <b>Forward:</b> GCATCTTCTTTTGCCTCG      |
|                                         | <b>Reverse:</b> GACCAAATCCGTTGACTC      |
| <b>mouse <i>Ym1</i></b>                 | <b>Forward:</b> AGGAAGCCCTCCTAAGGACAA   |
|                                         | <b>Reverse:</b> AGCCTTGGAATGTCTTTCTCCAC |
| <b>mouse <i>Arginase 1 (Arg1)</i></b>   | <b>Forward:</b> CGGTTCTGGGAGGCCTATCT    |
|                                         | <b>Reverse:</b> CACCTCCTCTGCTGTCTTCC    |
| <b>mouse <i>Gapdh</i></b>               | <b>Forward:</b> AAGGCCGGGGCCCACTTGAA    |
|                                         | <b>Reverse:</b> TGGGTGGCAGTGATGGCATGG   |
| <b>mouse <i>Nos2</i></b>                | <b>Forward:</b> TCTGCAGCACTTGGATCAGG    |
|                                         | <b>Reverse:</b> TTCGGAAAGGGAGCAATGCCC   |
| <b>mouse <i>Interferon-γ (Ifng)</i></b> | <b>Forward:</b> CTTCAGCAACAGCAAGGCG     |
|                                         | <b>Reverse:</b> AGCGACTCCTTTTCCGCTTC    |
| <b>mouse <i>Cd31</i></b>                | <b>Forward:</b> CTGCAGGCATCGGCAA        |
|                                         | <b>Reverse:</b> GCATTTTCGCACACCTGGAT    |
| <b>viral <i>EIA</i></b>                 | <b>Forward:</b> AATGGCCGCCAGTCTTTT      |
|                                         | <b>Reverse:</b> ACACAGGACTGTAGACAA      |
|                                         |                                         |
| <b>HUMAN p65 BINDING SITE ON:</b>       | <b>5'→3'</b>                            |
| <b><i>IL8</i> promoter</b>              | <b>Forward:</b> TGGGCCATCAGTTGCAAATC    |
|                                         | <b>Reverse:</b> AGTGCTCCGGTGGCTTTT      |
| <b><i>CCL2</i> promoter</b>             | <b>Forward:</b> CCTGGAAATCCACAGGATGC    |
|                                         | <b>Reverse:</b> CGAGAGTGCGAGCTTCAG      |
